# Supplementary material
Source: PubMed Central journal article supplement (PMC9342632)
Supplement: ASN.2021101343SupplementaryData1.pdf [file ASN.2021101343SupplementaryData1.pdf]

***Martin et al.*** Supplemental Material

Supplemental Video. Focal adhesions are less dynamic in Nck1/Nck2 double knockout podocytes.

Supplemental Table 1: Antibody information for immunoprecipitation experiments.

Supplemental Table 2: Antibody information for immunoblotting experiments.

Supplemental Table 3: Antibody information for immunofluorescent experiments.

Supplemental Table 4: Sequences used for CRISPR-Cas9 gene editing and TIDE analysis.

Supplemental Table 5: Primers used for semi-quantitative real-time reverse transcriptase polymerase chain reaction.

Supplemental Table 6: Primers used for genotyping.

Supplemental Figure 1. Generation of wildtype and Nck1 and Nck2 double knockout mouse podocyte cell lines.

Supplemental Figure 2. Gene expression analysis of wildtype and Nck1 and Nck2 double knockout podocytes.

Supplemental Figure 3. Normalized enrichment scores from gene set enrichment analysis of microarray data.

Supplemental Figure 4. Multi-faceted contributions of Nck1 and Nck2 to  $\alpha$  actinin-4 and  $\beta$ 1 integrin-related cell adhesion.

Supplemental Figure 5. Loss of Nck1 or Nck2 (but not Nck1/2 haploinsufficiency) results in biochemical abnormalities and susceptibility to disease.

Supplemental References

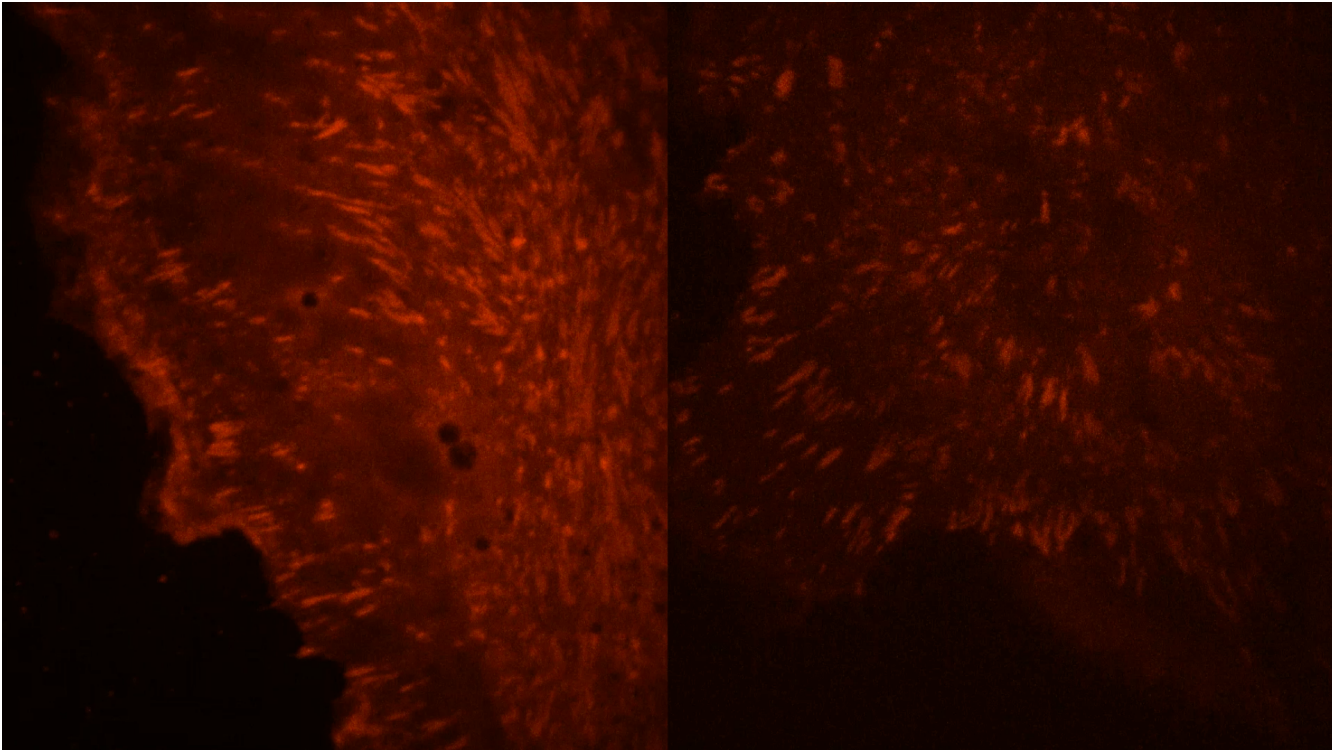

**Supplemental Video. Focal adhesions are less dynamic in Nck1/Nck2 double knockout podocytes.** Wildtype (left) and Nck1/2 double knockout (right) podocytes were transduced with paxillin-mCherry adenovirus. Images were taken each minute for 22 minutes to profile focal adhesion dynamics. 100x optical zoom. Video file available online in Supplemental Material section.

**Supplemental Table 1:** Antibody information for immunoprecipitation experiments. Pr-A: proteinA-sepharose beads.

| Immunoprecipitation      |         |                          |                                                     |
|--------------------------|---------|--------------------------|-----------------------------------------------------|
| Antibody                 | Species | Source                   | Concentration                                       |
| anti-IgG                 | rabbit  | Cell signalling; 2729    | 1ul/ 100ul Pr-A beads                               |
| anti-Nck (1794)          | rabbit  | Larose Lab <sup>83</sup> | 1ul/ 100ul Pr-A beads                               |
| anti- $\alpha$ actinin 4 | rabbit  | Abcam; ab108198          | 1ul/ 100ul Pr-A beads                               |
| Magnetic anti-FLAG beads | mouse   | Sigma; M8823             | 20 $\mu$ L of a 50% magnetic anti-FLAG M2 beads/ IP |

**Supplemental Table 2:** Antibody information for immunoblotting experiments.

| Western Immunoblotting   |         |                                       |               |
|--------------------------|---------|---------------------------------------|---------------|
| Antibody                 | Species | Source                                | Concentration |
| anti-GAPDH               | mouse   | Applied Biologic Materials Inc.; G041 | 1:1000        |
| anti- $\beta$ -actin     | mouse   | Sigma-Aldrich; A5441                  | 1:2000        |
| anti-Nck (1794)          | rabbit  | Larose Lab <sup>83</sup>              | 1:1000        |
| anti-mouse HRP           | goat    | Bio-Rad; 170-6516                     | 1:10000       |
| anti-rabbit HRP          | goat    | Bio-Rad; 170-6515                     | 1:10000       |
| anti-FLAG M2             | mouse   | Sigma-Aldrich; F3165                  | 1:2000        |
| anti-WT-1 (C-19)         | rabbit  | Santa Cruz; sc-192                    | 1:500         |
| anti-eplin               | rabbit  | Thermo Proteintech; 16639-1-AP        | 1:2000        |
| anti-palladin            | rabbit  | Thermo Proteintech; 10853-1-AP        | 1:2000        |
| anti-p130-Cas            | mouse   | BD Biosciences; 610272                | 1:1000        |
| anti-Fak                 | rabbit  | Millipore; 04-591                     | 1:1000        |
| anti-actin               | rabbit  | Cytoskeleton; AAN01                   | 1:500         |
| anti- $\beta$ 1 integrin | mouse   | Santa Cruz; sc-9970                   | 1:1000        |
| anti-Nck                 | mouse   | BD Biosciences; N15920                | 1:1000        |
| anti- $\alpha$ actinin-4 | rabbit  | Abcam; ab108198                       | 1:2000        |

**Supplemental Table 3:** Antibody information for immunofluorescent experiments.

| Immunofluorescence              |            |                            |               |
|---------------------------------|------------|----------------------------|---------------|
| Antibody                        | Species    | Source                     | Concentration |
| anti-nephrin                    | guinea pig | 20R-NP002; Fitzgerald Inc. | 1:100         |
| anti-synaptopodin               | mouse      | Fitzgerald; 10R-2373       | 1:150         |
| anti-WT-1                       | rabbit     | Santa Cruz; sc-192)        | 1:50          |
| anti-paxillin                   | rabbit     | Santa Cruz; sc-5574        | 1:50          |
| anti-paxillin                   | rabbit     | Abcam; Ab32054             | 1:100         |
| anti-paxillin 5H-11             | mouse      | Upstate; 05-417            | 1:100         |
| anti- $\beta$ 1 integrin        | rat        | Millipore; MAB1997         | 1:500         |
| anti-active $\beta$ 1 integrin  | rat        | BD Biosciences; BD550531   | 1:50          |
| anti-laminin $\alpha$ 5         | mouse      | DSHB P3H9                  | neat          |
| TexasRed phalloidin             | -          | T7471; Invitrogen          | 1:50          |
| Phalloidin-647                  | -          | A30107; Invitrogen         | 1:100         |
| anti-Alpha actinin-4            | rabbit     | Abcam; ab108198            | 1:100         |
| anti-FLAG-M2                    | mouse      | Sigma; F3165               | 1:100         |
| anti-rabbit Alexa Fluor 488     | goat       | A11008; Invitrogen         | 1:400         |
| anti-rabbit Alexa Fluor 594     | goat       | A11076; Invitrogen         | 1:400         |
| anti-mouse Alexa Fluor 488      | goat       | A11001; Invitrogen         | 1:400         |
| anti-mouse Alexa Fluor 594      | goat       | A11005; Invitrogen         | 1:400         |
| anti-rat Alexa Fluor 488        | goat       | A11006; Invitrogen         | 1:400         |
| anti-guinea pig Alexa Fluor 594 | goat       | A11076; Invitrogen         | 1:400         |

**Supplemental Table 4:** Sequences used for CRISPR-Cas9 gene editing and TIDE analysis. FW, forward; RV, reverse.

| Gene Target  | Guide Sequence (FW/RV) | TIDE Primer (FW/RV)  | TIDE Efficiency |
|--------------|------------------------|----------------------|-----------------|
| <i>Actn4</i> | TACCAGTACGGCCCGAACAG   | AGTTCCATTGCAACCTCCCG | 93.9%           |
|              | CTGTTCGGGCCGTACTGGTAC  | CATTCATGACTTGGGCCCCG |                 |
| <i>Palld</i> | ACGGAAGCTTCGCTTCAAGG   | TGCCATCAGTACTTCCGTGT | 90.9%           |
|              | CCTTGAAGCGAAGCTTCCGTC  | CCCTATGGGTGTCCGAACCT |                 |
| <i>Limal</i> | TCGTGGCTGTTCTCTGAGCG   | n/a                  | undetermined    |
|              | CGCTCAGAGAACAGCCACGAC  | n/a                  |                 |

**Supplemental Table 5:** Primers used for semi-quantitative real-time reverse transcriptase polymerase chain reaction. FW, forward; RV, reverse.

| Gene target   | Primer (FW/RV)            | Harvard primer bank number |
|---------------|---------------------------|----------------------------|
| <i>Gapdh</i>  | AGGTCGGTGTGAACGGATTT      |                            |
|               | GGGGTCGTTGATGGCAACA       |                            |
| <i>Hprt</i>   | CATGGACTGATTATGGACAGG     |                            |
|               | ATCCAGCAGGTCAGCAAAGAA     |                            |
| <i>Nck1</i>   | GCGGTCCTCAGGTGACTGG       |                            |
|               | ATTCATGGAATTTCGAACTCGCCAC |                            |
| <i>Nck2</i>   | AGGACAGGCTACGTGCCTT       |                            |
|               | GTACTCCGCATCAGTGCTTGG     |                            |
| <i>Mmp2</i>   | CAAGTTCCTCCGCGATGTC       | 6678902a1                  |
|               | TTCTGGTCAAGGTCACCTGTC     |                            |
| <i>Mmp13</i>  | CTTCTTCTTGTTGAGCTGGACTC   | 6678896a1                  |
|               | CTGTGGAGGTCAGTGTAGACT     |                            |
| <i>Intav</i>  | GGGCCTATTGTTTCAGCACAT     |                            |
|               | GATTCCACAGCCCAAAGTGT      |                            |
| <i>Intb3</i>  | GTAATCGAGATGCCCCAGAG      |                            |
|               | CTTCCATCCAGGGCAATATG      |                            |
| <i>Inta3</i>  | TGCCGTTCTAAATCCTCCAC      |                            |
|               | CACCGGTAGTCAGGCAATTT      |                            |
| <i>Intb1</i>  | GGTGTCGTGTTTGTGAATGC      |                            |
|               | TCCTGTGCACACGTGTCTT       |                            |
| <i>Lama5</i>  | ACCCAAGGACCCACCTGTAG      |                            |
|               | TCATGTGTGCGTAGCCTCTC      |                            |
| <i>Lamb2</i>  | CGTGACCATCCAACCTGGACCTGG  |                            |
|               | CCAAGCCTTCCCAAAGTCAGAAG   |                            |
| <i>Col4a1</i> | CTGGCACAAAAGGGACGAG       | 33859528a1                 |
|               | ACGTGGCCGAGAATTTTACC      |                            |
| <i>Col4a2</i> | GACCGAGTGCGGTTCAAAG       | 556299a1                   |
|               | CGCAGGGCACATCCAACCTT      |                            |
| <i>Col4a3</i> | CAAAGGCATCAGGGGAATAACT    | 6680968a1                  |
|               | ATCCGTTGCATCCTGGTAAAC     |                            |
| <i>Col4a4</i> | ATGAGGTGCTTTTTTCAGATGGAC  | 34328045a1                 |
|               | GGGGCCGCCATACTTCTTG       |                            |
| <i>Col4a5</i> | AGGCGAAATGGGTATGATGGG     | 26348681a1                 |
|               | CTCCCTTACCGCCCTTTTCTC     |                            |
| <i>Col5a2</i> | CCCTGGCTTGAAAGGTCACAG     | 86613789c3                 |
|               | GCCCATAGCACCCATTGGAC      |                            |
| <i>Colla1</i> | TAAGGGTACCGCTGGAGAAC      |                            |
|               | GTTACCTCTCTCACCAGCA       |                            |
| <i>Fn1</i>    | ATGTGGACCCCTCCTGATAGT     |                            |
|               | GCCCAGTGATTTTCAGCAAAGG    |                            |

**Supplemental Table 6:** Primers used for genotyping. FW, forward; RV, reverse; Podo-dKO, podocyte-specific Nck1/Nck2 double knockout; KO, knockout.

| Gene target | Primer (FW/RV)              | Mouse line |
|-------------|-----------------------------|------------|
| Cre         | GCAGAACCTGAAGATGTTTCGC      | Podo-dKO   |
|             | GCACGTTACACGGCATCAACG       |            |
| Rtta        | CGCACTTCAGTTACTTCAGGTCCTC   | Podo-dKO   |
|             | GCTTATGCCTGATGTTGATGATGC    |            |
| Nck1 WT     | GCATGTAGACAATTACACTTCAGCACC | Podo-dKO   |
|             | ATTCATGGAATTTCGAACTCGCCACC  | Nck1KO     |
| Nck1 lacZ   | CTGATTGAAGCAGAAGCCTGCGATG   | Podo-dKO   |
|             | TATTGGCTTCATCCACCACATACAGG  | Nck1KO     |
| Nck2 flox   | GGATACCACATTGGCATTAGTAG     | Podo-dKO   |
|             | GTGCTCATTTGACAAGTGACAC      |            |
| Nck2KO WT   | CTACACTGCCAGCAGGACCAGG      | Nck2KO     |
|             | CACATACAGATACACACACGCTGAAG  |            |
| Nck2KO KO   | CCAATGGCAAAGGTGATCATGACGG   | Nck2KO     |
|             | CGCCTTCTATCGCCTTCTTGACGAG   |            |

Supplementary figure 1

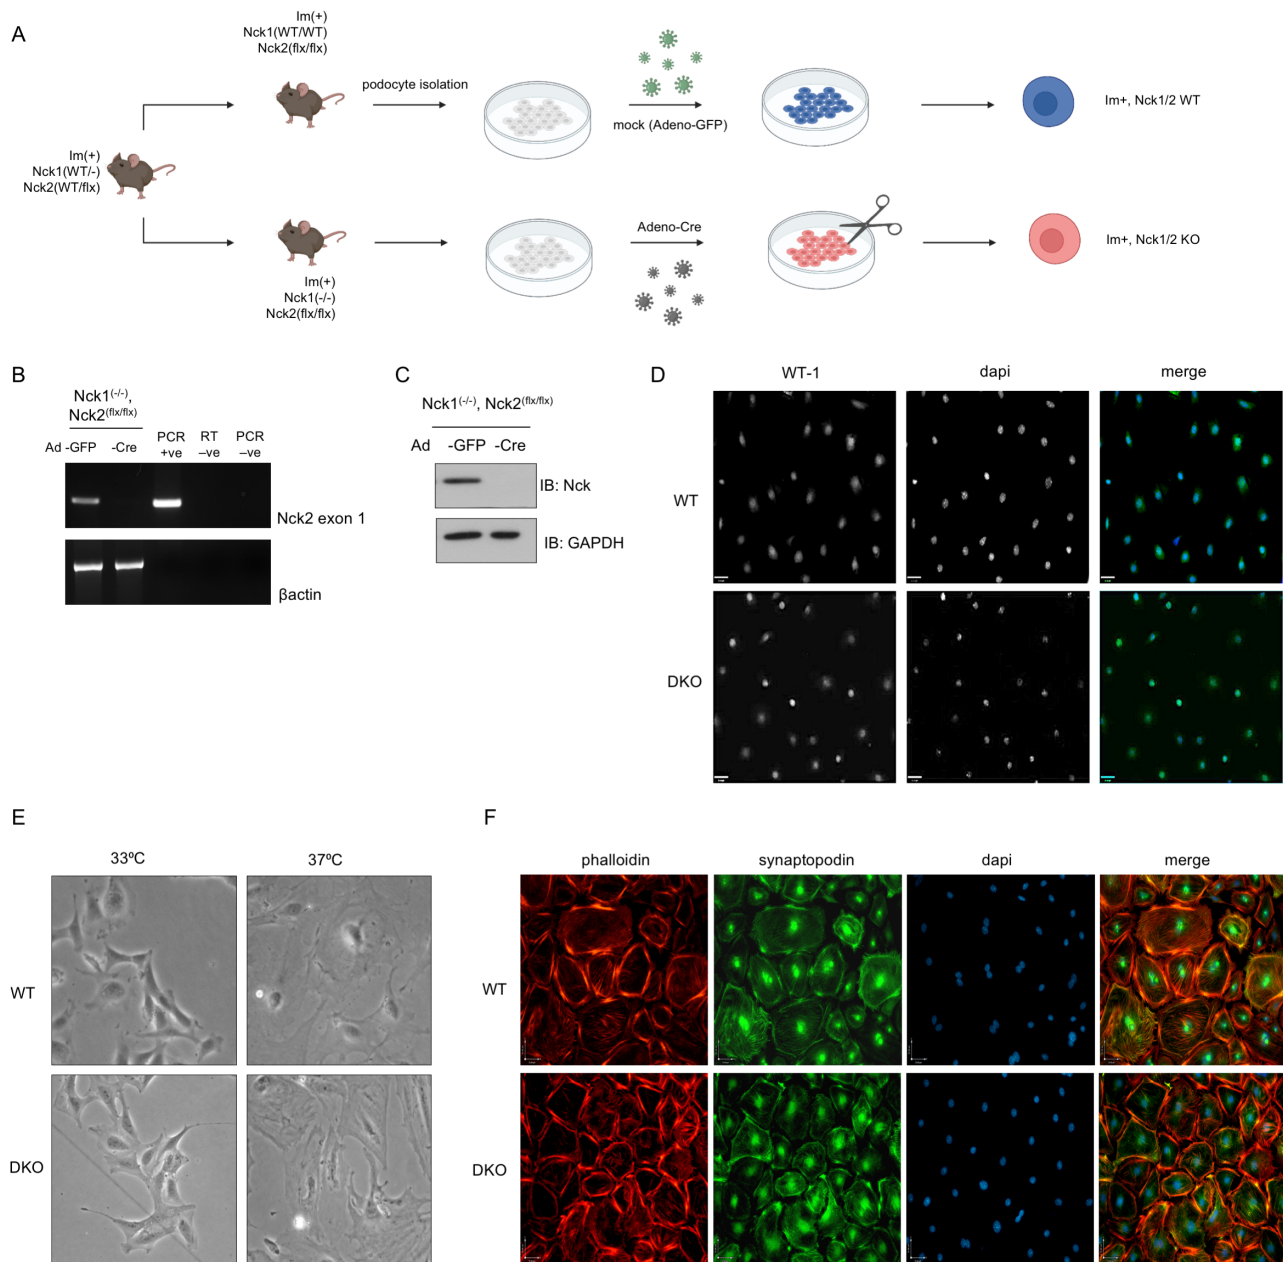

**Supplemental Figure 1. Generation of wildtype and Nck1 and Nck2 double knockout mouse podocyte cell lines.** (A) Scheme for generation of wildtype (WT) and Nck1 and Nck2 double knockout (dKO) conditionally immortalized mouse podocyte cell lines (MPCs). (B) Reverse transcriptase polymerase chain reaction (RT PCR) demonstrating adenoviral expression of Cre (adeno-Cre) but not mock (adeno-GFP) allows for targeted excision of floxed Nck2 and the generation of dKO cells. (C) Western immunoblot (IB) validating knockout of Nck1 and Nck2 in podocyte cell lines. (D) Immunofluorescent (IF) imaging of Wilm's Tumour (WT)-1 in WT and dKO podocytes. (E) Phase-contrast images of WT and dKO MPCs cultured under permissive (33°C, IFN $\gamma$  supplementation) and differentiating (37°C) conditions. (F) IF imaging of phalloidin and synaptopodin in WT and dKO MPCs.

Supplementary figure 2

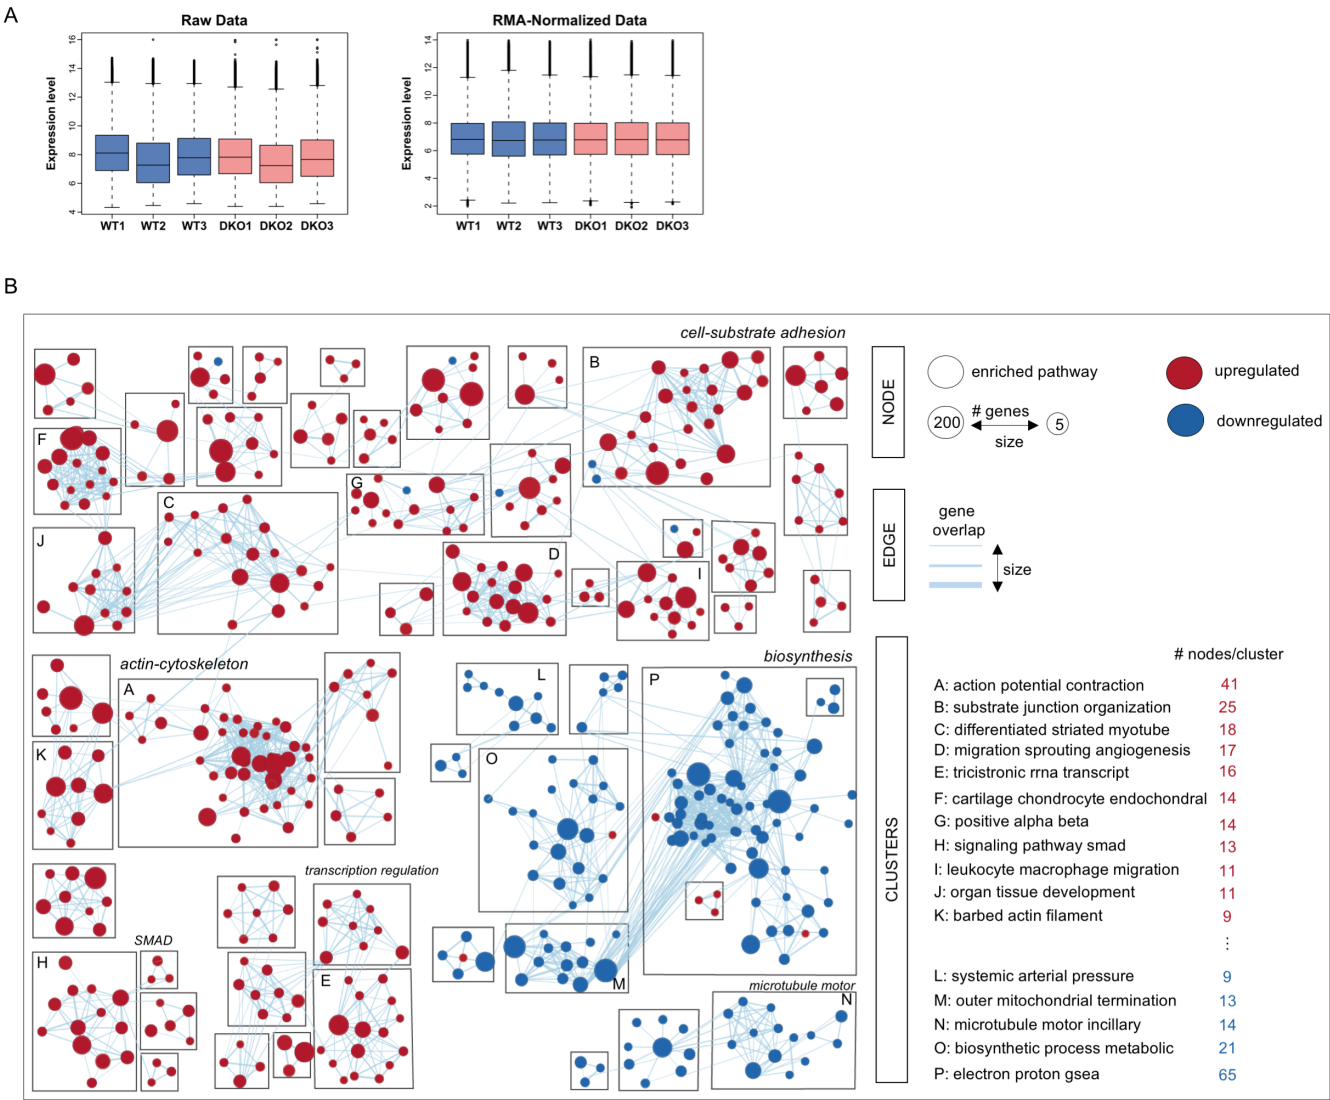

**Supplemental Figure 2. Gene expression analysis of wildtype and Nck1 and Nck2 double knockout podocytes.** (A) BoxPlots of raw and RMA-normalized microarray data from 3 biological replicates. (B) Gene set enrichment analysis (GSEA) map generated from microarray of WT and dKO MPCs (FDR  $Q$  value  $< 0.05$  and combined coefficient  $> 0.375$  with combined constant = 0.5). Red and blue nodes represent up- and down-regulated genes respectively. Node size is proportional to the number of genes per term. Node clusters were labelled using AutoAnnotate following manual organization in Cytoscape. Labels for minimally interconnected networks were removed for clarity.

Supplementary figure 3

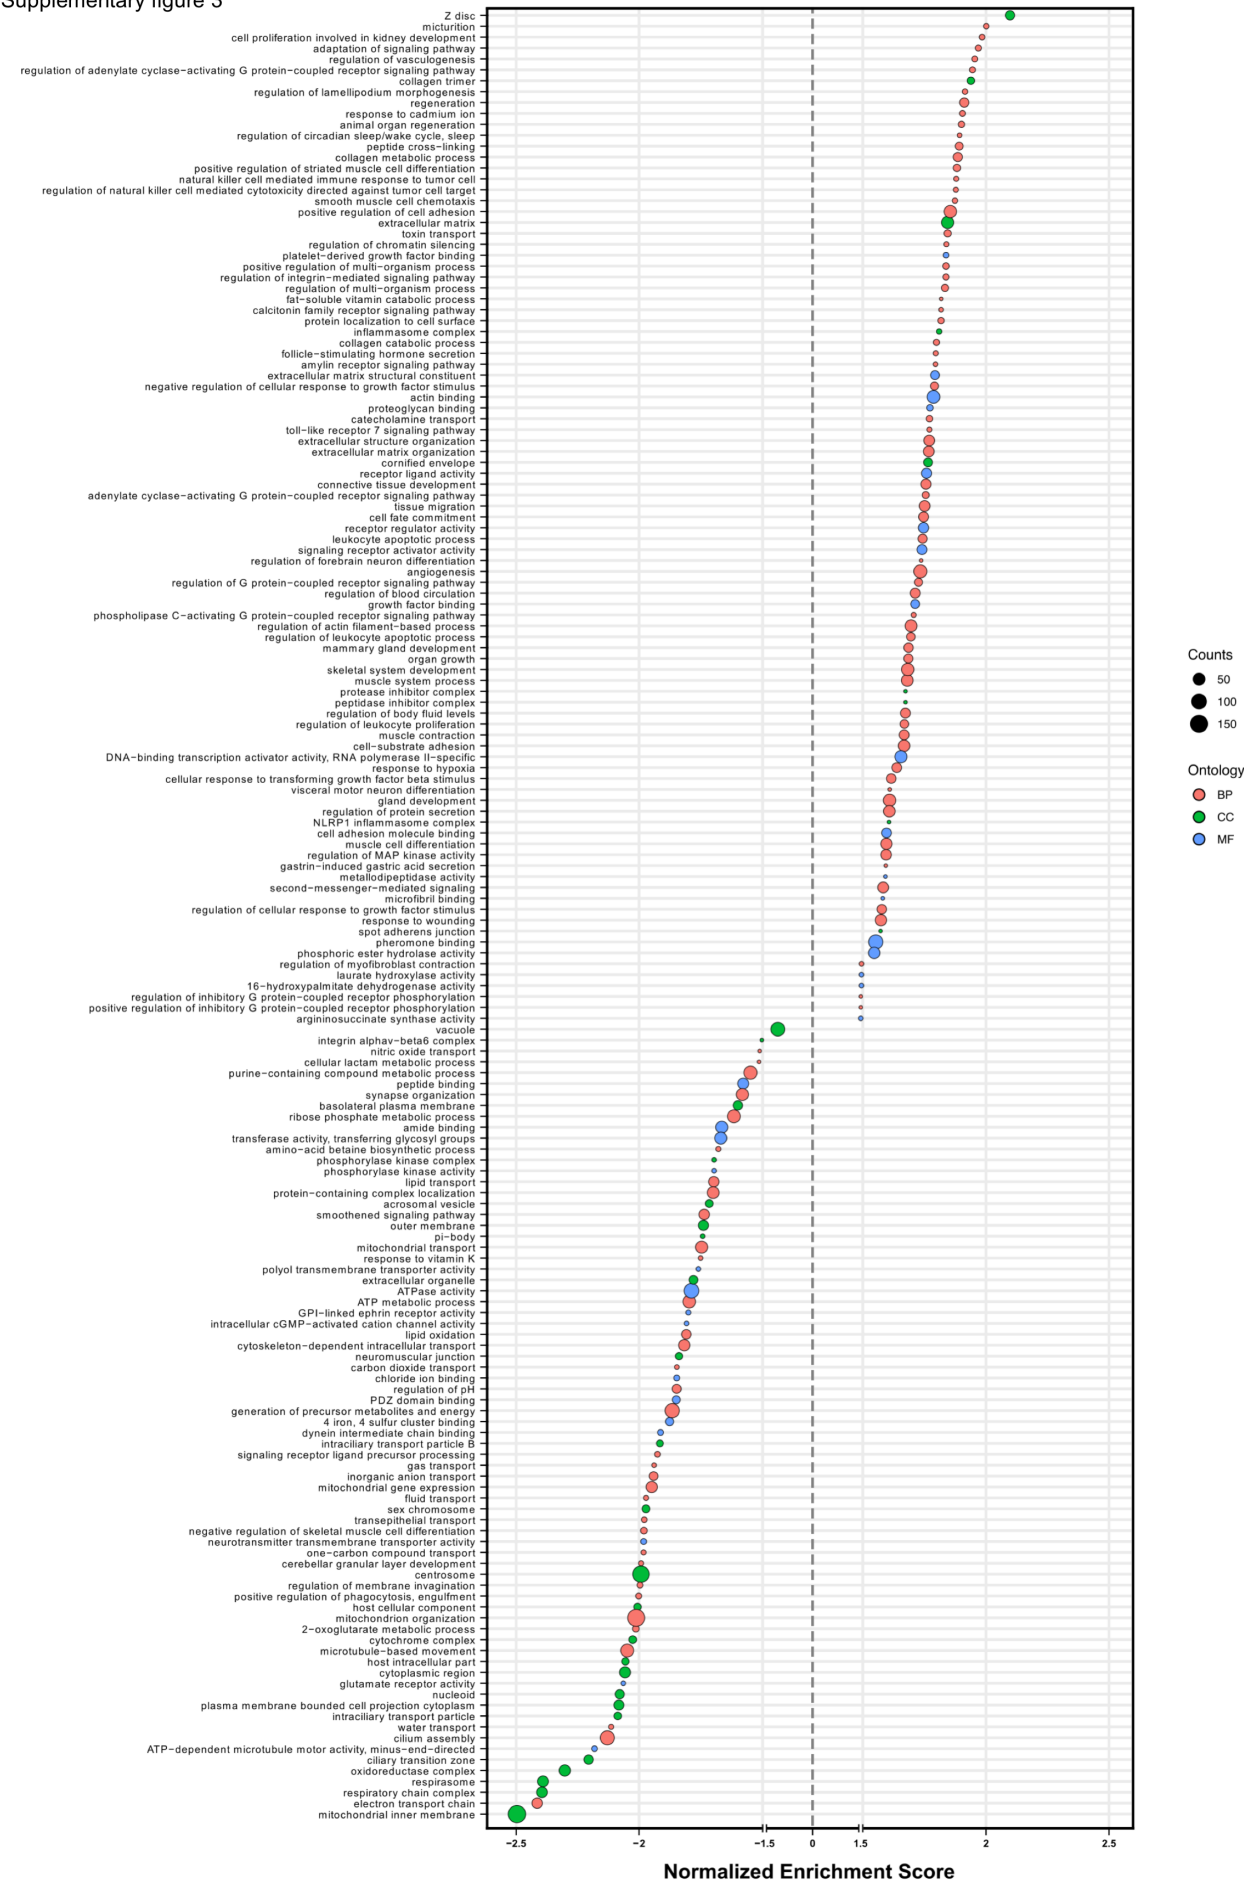

**Supplemental Figure 3. Normalized enrichment scores from gene set enrichment analysis of microarray data.** (A) Dot plot of normalized enrichment scores for terms in upregulated and downregulated gene sets generated from gene set enrichment analysis of microarray data. Enriched gene ontology terms (Biological process (BP), Cell component (CC) and Molecular Function (MF)) are represented by dot colour and the relative abundance of genes (counts)/ term is indicated by dot size.

Supplementary figure 4

A

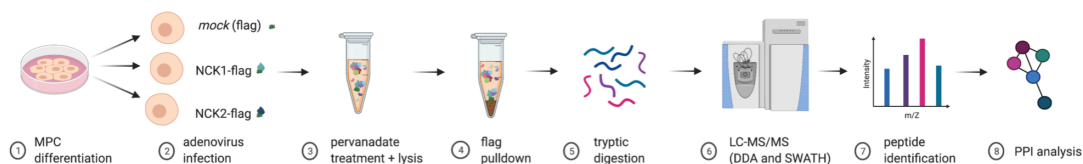

B

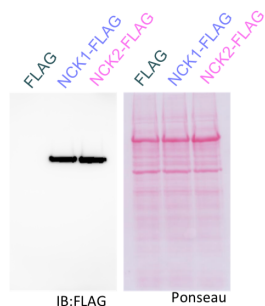

C

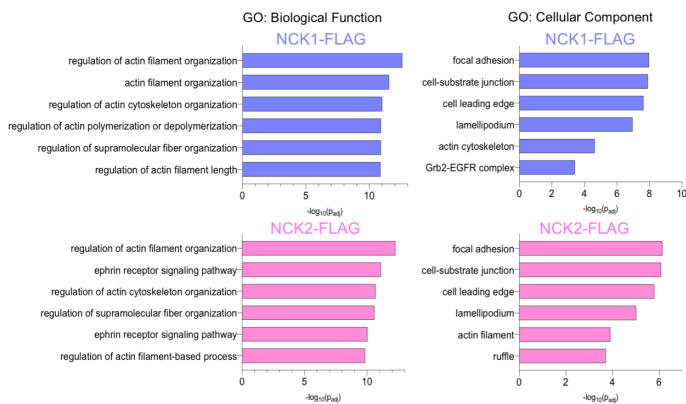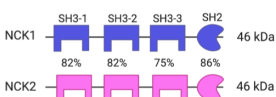

D

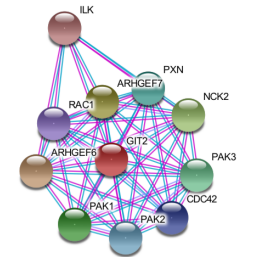

E

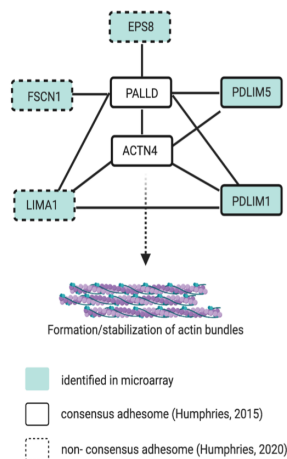

F

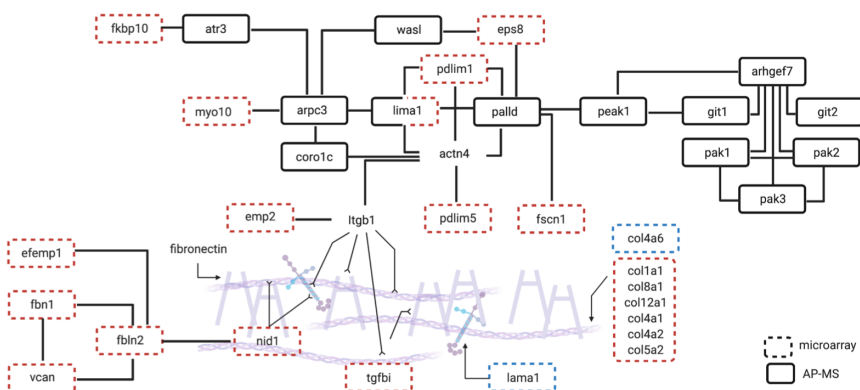

G

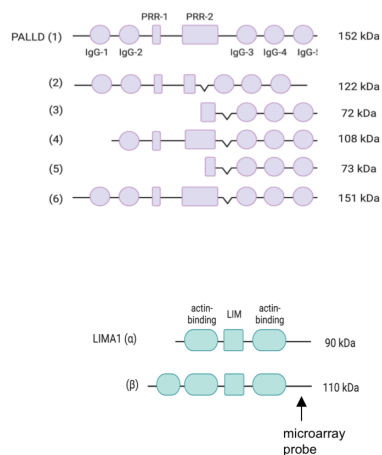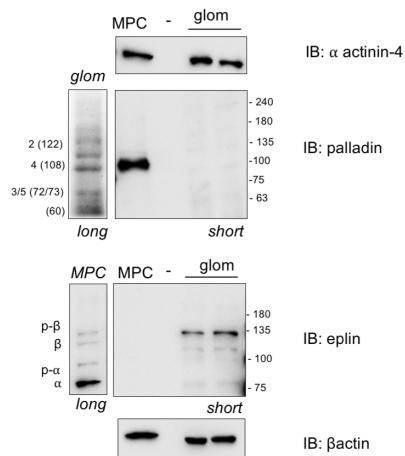

**Supplemental Figure 4. Multi-faceted contributions of Nck1 and Nck2 to  $\alpha$  actinin-4 and  $\beta$ 1 integrin-related cell adhesion.** (A) Experimental workflow for affinity purified mass spectrometry (AP-MS)-based identification of NCK1 and NCK2 protein interactors in mouse podocyte cells (MPCs). FLAG-NCK1, FLAG-NCK2 or FLAG (control) ‘baits’ were delivered using adenovirus in differentiated WT podocytes and subsequently affinity purified alongside interacting ‘prey’ proteins from cell lysates (B) Ponceau staining and flag immunoblot (IB) of samples used for AP-MS. (C) Gene ontology (GO) analysis of biological function and cellular componentry of preys captured by NCK1 or NCK2 and identified by AP-MS. NCK1 and NCK2 binding domain homology is high, as is the similarity of the enrichment terms identified. (D) String enrichment of  $\beta$ Pix, GIT, PAK and Nck. (E) Relationship between  $\alpha$  actinin-4 binding partners (as identified by string) that were also identified as upregulated genes in Nck1 and 2 double knockout (dKO) cells by microarray. (F) Established interactions (identified by string) between NCK1 and NCK2 interactors identified by AP-MS and genes >2-fold mis-regulated by microarray that are relevant to  $\alpha$  actinin-4 and  $\beta$ 1 integrin-related cell adhesion. Red boxes indicate upregulated genes while blue boxes represent downregulated genes. (G) Isoform structure and protein expression profiles of eplin and palladin in MPCs and mouse glomerular samples. Palladin expression was restricted to a ~108 kDa isoform in wildtype podocyte cells. Conversely, several palladin isoforms could be detected in mouse glomerular samples, albeit in low abundance compared to cultured cells. On the contrary, eplin was highly expressed in glomerular samples and a band likely corresponding to the  $\beta$  isoform was enriched, while expression of a band corresponding to the presumed  $\alpha$  isoform was predominant in cultured podocytes. Interestingly, in cells exposed to shear stress, eplin’s  $\beta$  isoform predominates and functions in actin bundle stabilization<sup>84</sup>. Conversely, eplin’s  $\alpha$  isoform is more widely expressed and contributes to actin dynamics through its inhibition of Arp2/3 actin branching downstream of WASp/WAVE. Doublets of each eplin isoform were observed, the possible result of phosphorylation events, which increase eplin’s affinity for actin<sup>85</sup>.

Supplementary figure 5

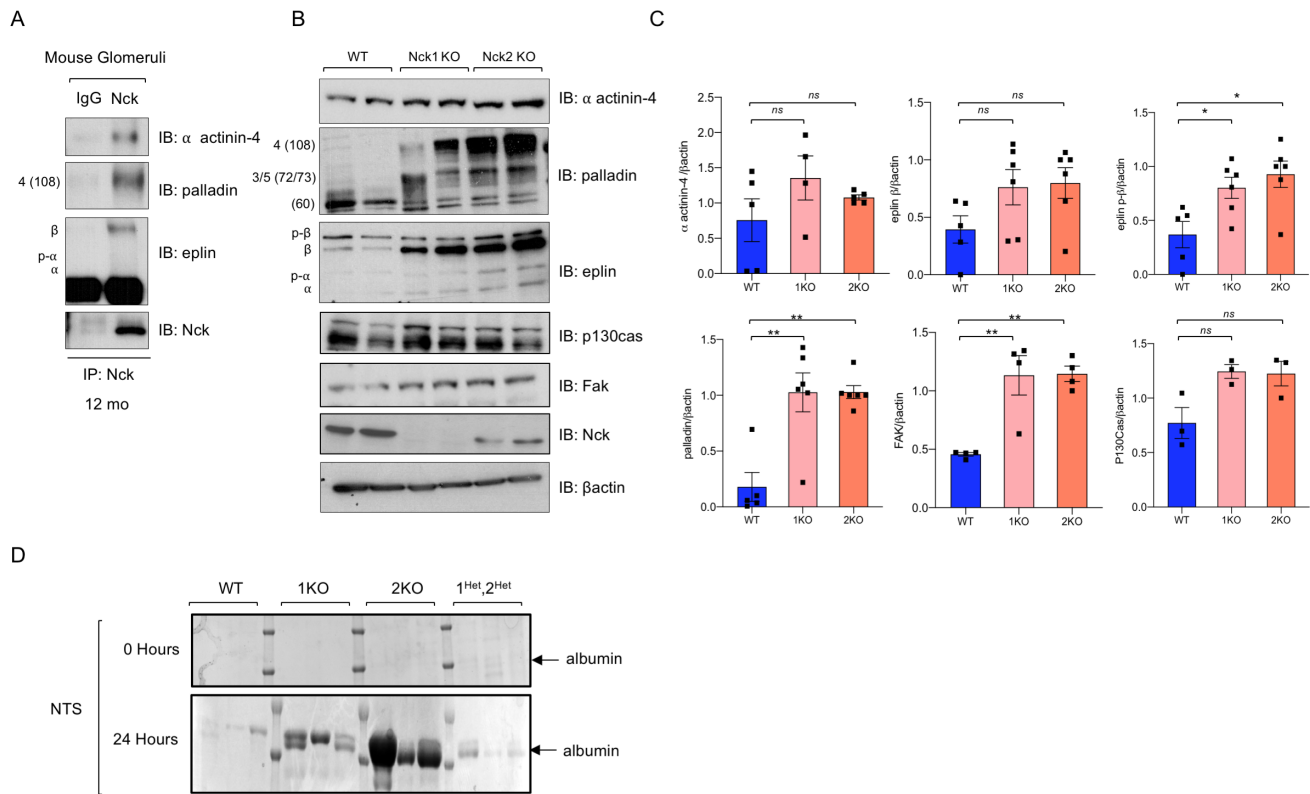

**Supplemental Figure 5. Loss of Nck1 or Nck2 (but not Nck1/2 haploinsufficiency) results in biochemical abnormalities and susceptibility to disease.** (A) Co-immunoprecipitation (IP) of Nck with  $\alpha$  actinin-4, palladin and eplin from glomerular lysates of wildtype (WT) mice. (B) Immunoblotting (IB) and densitometric quantification (C) of glomerular lysates from wildtype (WT), Nck1 knockout (Nck1KO) and Nck2KO mice at 8 weeks of age. (C) Coomassie urine gel of WT, Nck1KO, Nck2KO, and Nck1-/+ , Nck2-/+ (double heterozygous) at the peak timepoint (24 hours) of nephrotoxic serum (NTS) induced-disease.

## Supplemental References

83. Lussier G, Larose L: A casein kinase I activity is constitutively associated with Nck. *J. Biol. Chem.* 272: 2688–2694, 1997
84. Maul RS, Song Y, Amann KJ, Gerbin SC, Pollard TD, Chang DD: EPLIN regulates actin dynamics by cross-linking and stabilizing filaments. *J. Cell Biol.* 160: 399–407, 2003
85. Han M-Y, Kosako H, Watanabe T, Hattori S: Extracellular signal-regulated kinase/mitogen-activated protein kinase regulates actin organization and cell motility by phosphorylating the actin cross-linking protein EPLIN. *Mol. Cell. Biol.* 27: 8190–8204, 2007
